# Supplementary material for: A Co-Doped Nanorod-like RuO2 Electrocatalyst with Abundant Oxygen Vacancies for Acidic Water Oxidation
Source: PubMed Central journal article supplement — iScience. 2019 Dec 4;23(1):100756. doi: 10.1016/j.isci.2019.100756 (PMC6941840; doi:10.1016/j.isci.2019.100756), 2019-12-04
Supplement: mmc1.pdf [file mmc1.pdf]

**ISCI, Volume 23**

**Supplemental Information**

**A Co-Doped Nanorod-like RuO<sub>2</sub>**

**Electrocatalyst with Abundant Oxygen**

**Vacancies for Acidic Water Oxidation**

**Yuanyuan Tian, Shuo Wang, Ever Velasco, Yueping Yang, Lujie Cao, Linjuan Zhang, Xing Li, Yichao Lin, Qiuju Zhang, and Liang Chen**

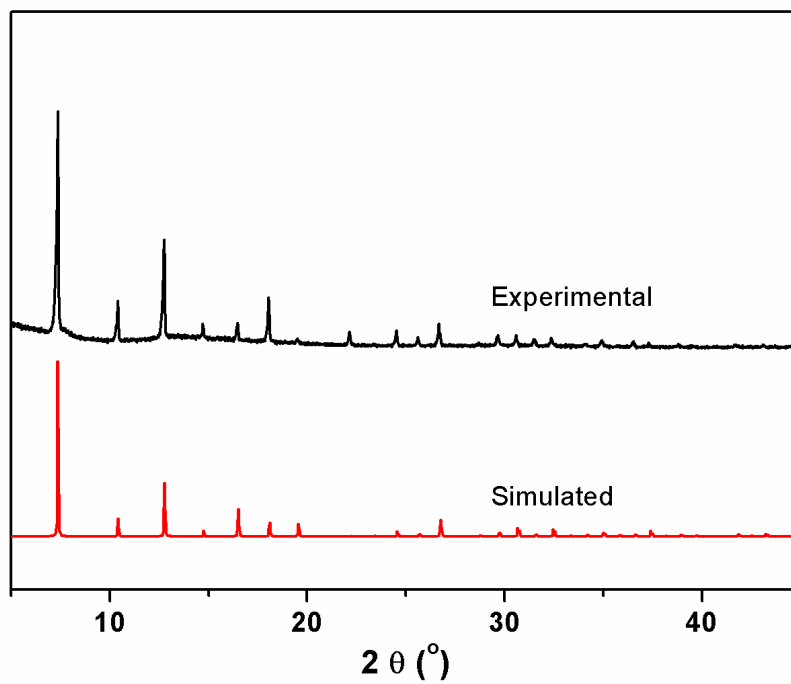

Figure S1. PXRD pattern of as-prepared ZIF-67. Related to Scheme 1.

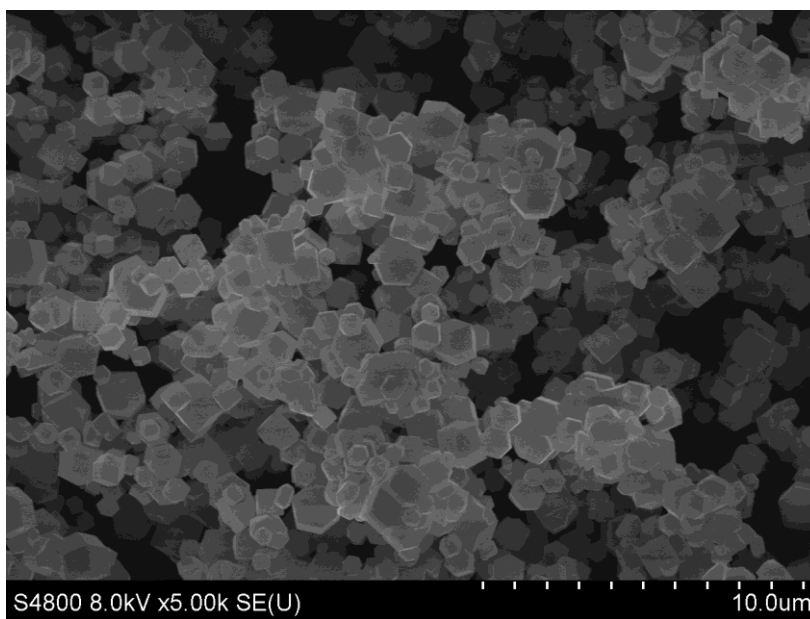

Figure S2. SEM image of as-prepared ZIF-67. Related to Scheme 1.

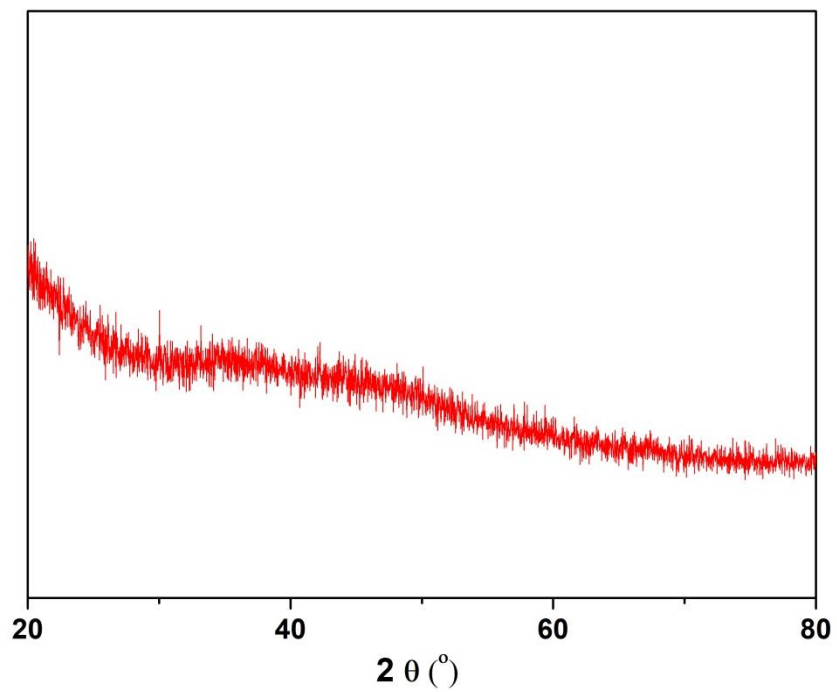

Figure S3. PXRD pattern of Ru-ZIF-67-C. Related to Figure 1.

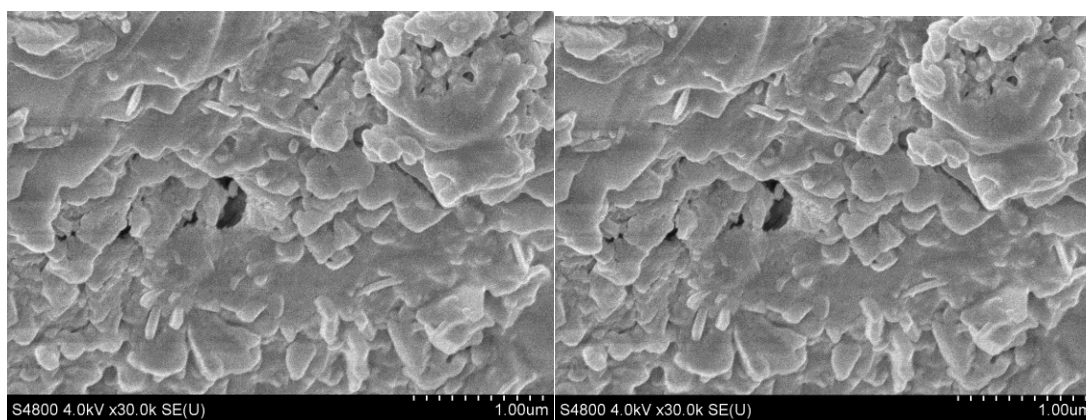

Figure S4. SEM images of Ru-ZIF-67-B and C. Related to Figure 1.

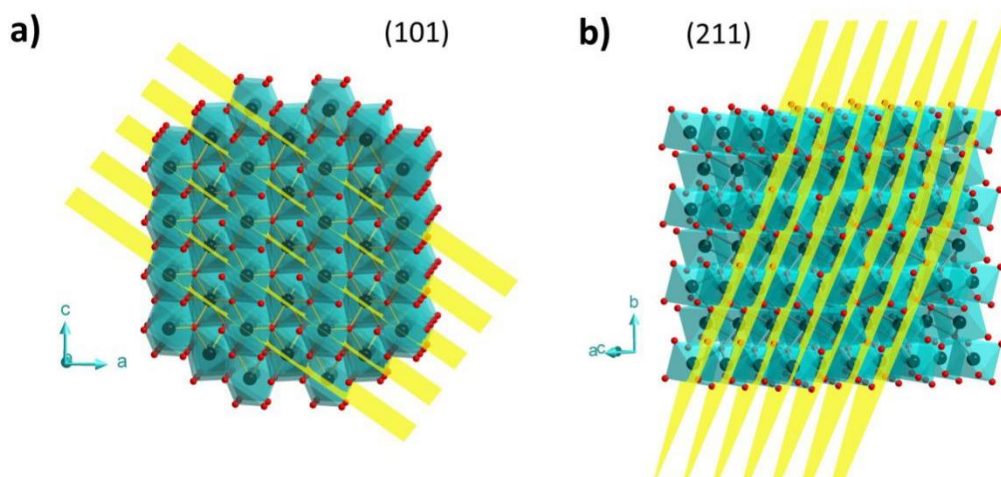

Figure S5. Crystal structure of RuO<sub>2</sub> viewed along different direction. The yellow planes represent the crystal facets of RuO<sub>2</sub>. Related to Figure 1.

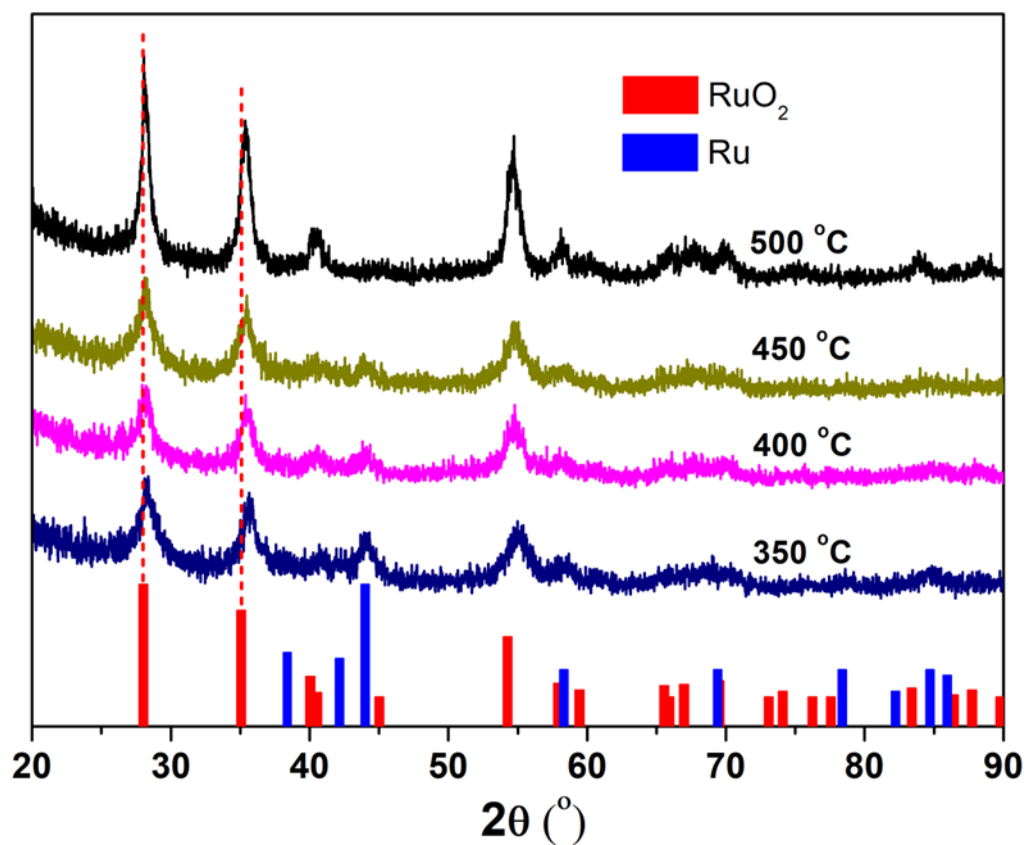

Figure S6. PXRD patterns of Co<sub>0.11</sub>Ru<sub>0.89</sub>O<sub>2-δ</sub> annealed at different temperatures.

Related to Figure 1.

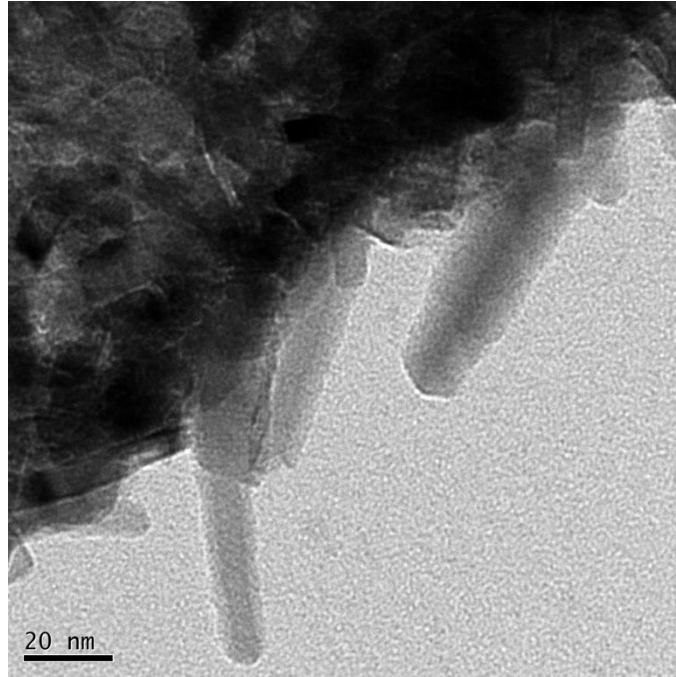

Figure S7. TEM image of  $\text{Co}_{0.27}\text{Ru}_{0.73}\text{O}_{2-\delta}$  annealed at 350 °C . Related to Figure 2.

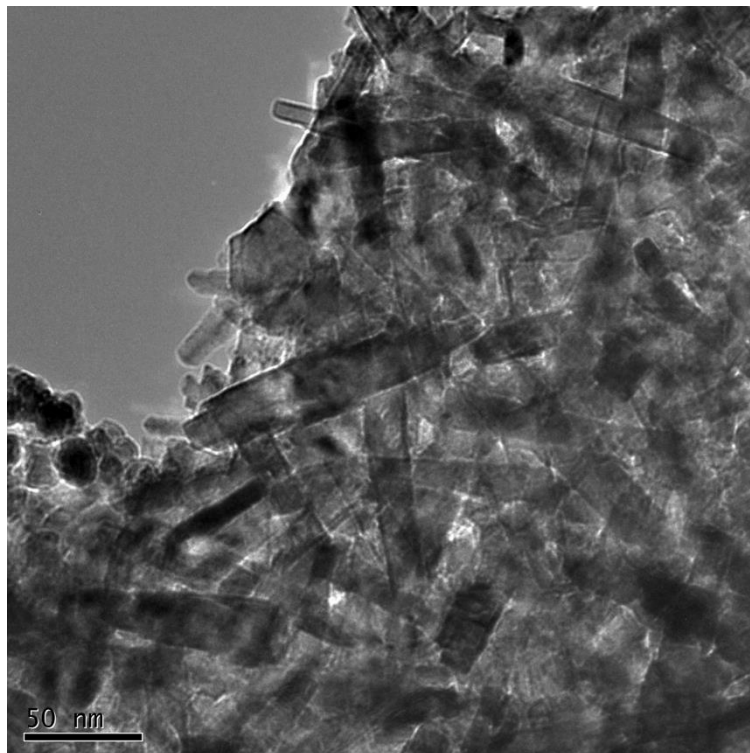

Figure S8. TEM image of  $\text{Co}_{0.18}\text{Ru}_{0.82}\text{O}_{2-\delta}$  annealed at 350 °C . Related to Figure 2.

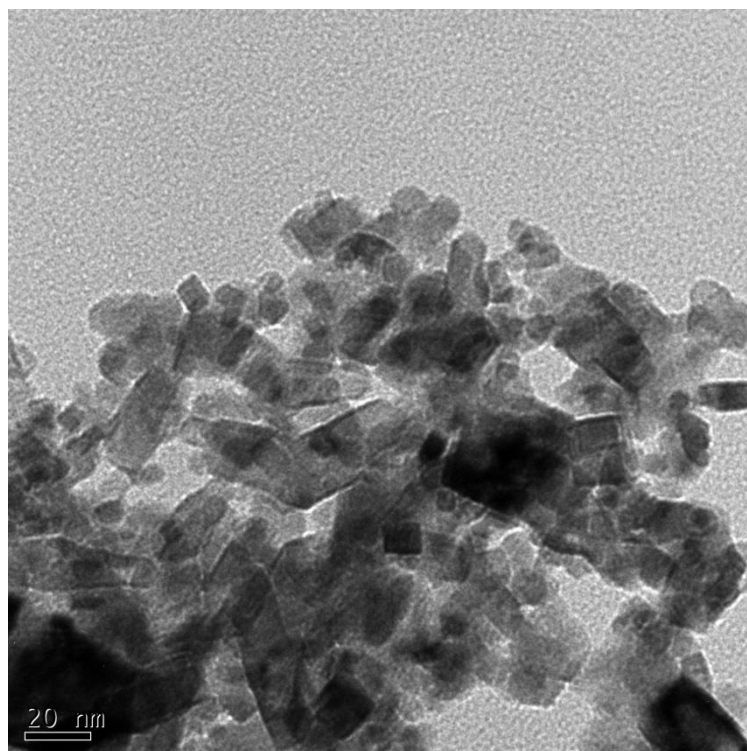

Figure S9. TEM image of  $\text{Co}_{0.04}\text{Ru}_{0.96}\text{O}_{2-\delta}$  annealed at 350 °C . Related to Figure 2.

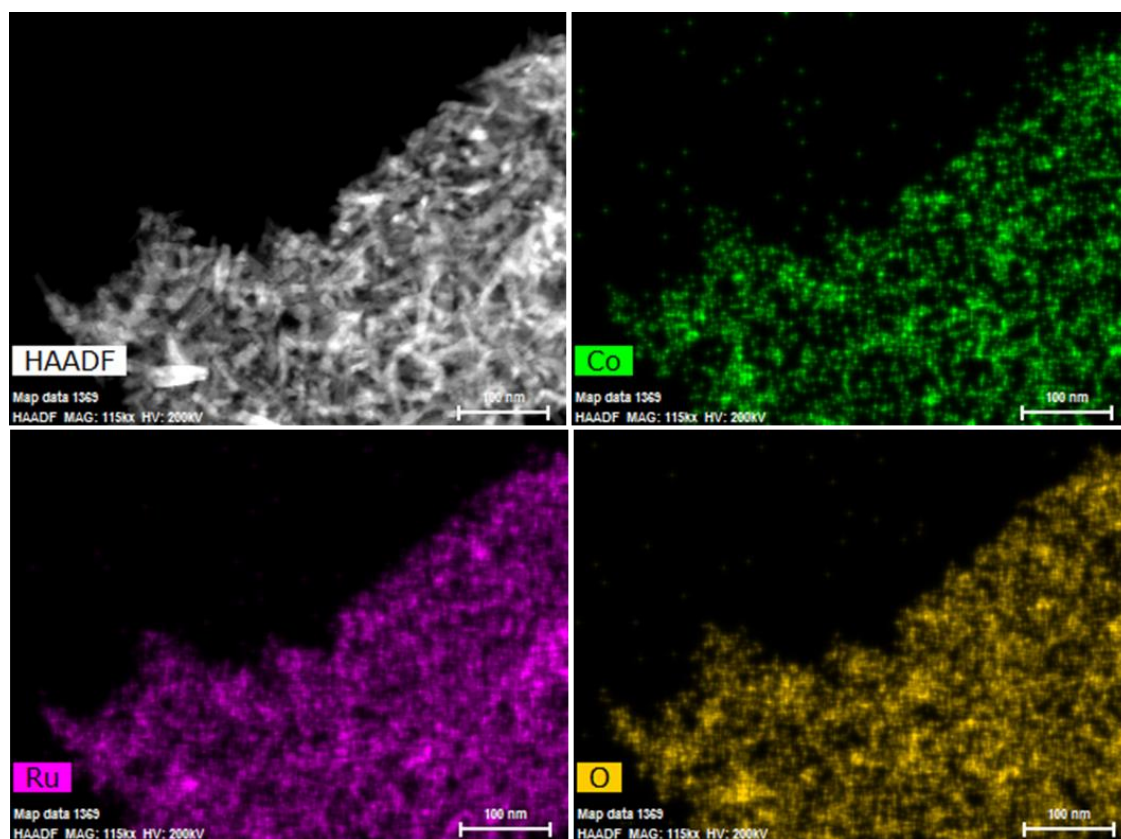

Figure S10. HAADF-STEM image and the corresponding element mapping images.

Related to Figure 2.

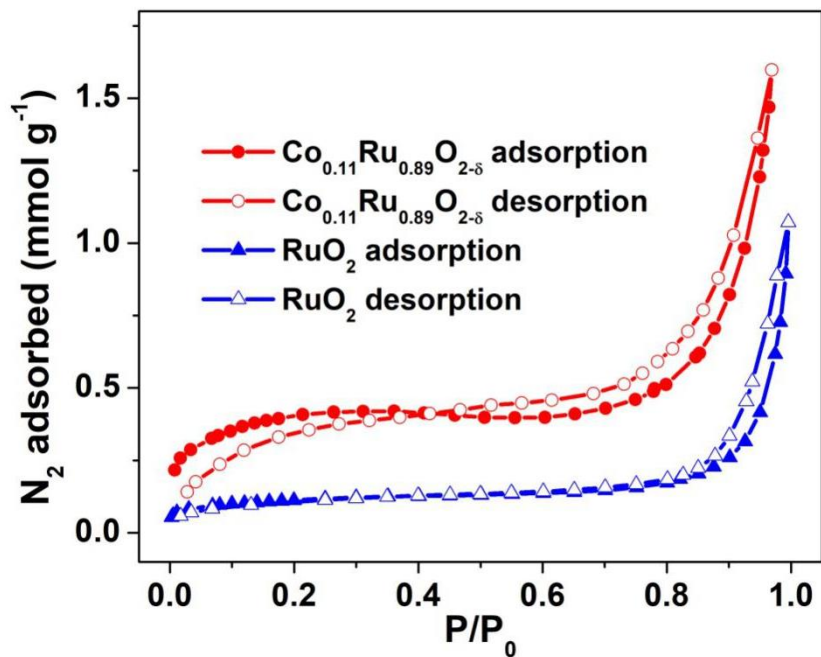

Figure S11.  $N_2$  adsorption-desorption isotherms of  $Co_{0.11}Ru_{0.89}O_{2-\delta}$ (350) and  $RuO_2$  at 77 K. Related to Figure 2.

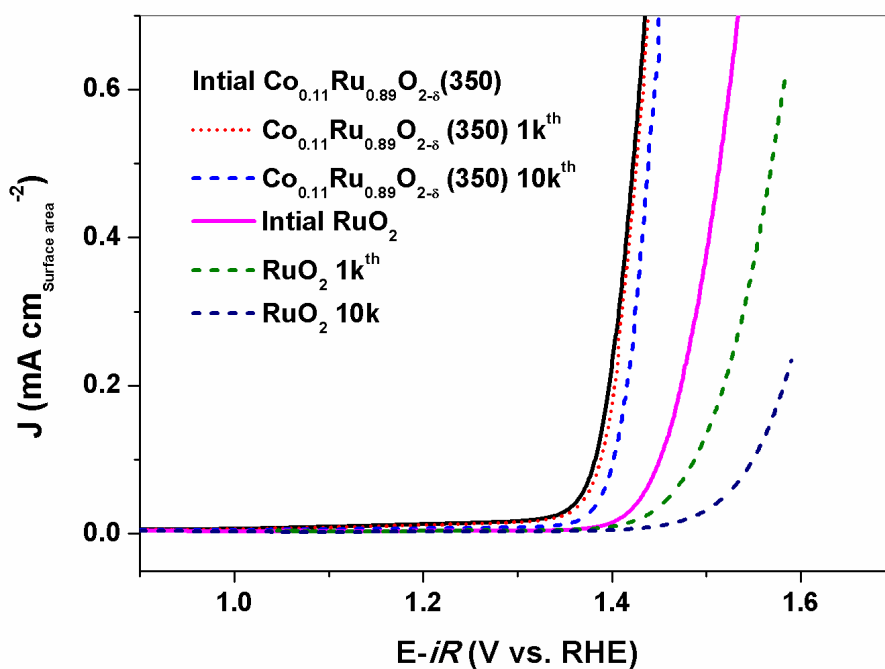

Figure S12. Intrinsic surface area based LSV curves of  $Co_{0.11}Ru_{0.89}O_{2-\delta}$  (350) and commercial  $RuO_2$  before and after CV cycling measurements. Related to Figure 3.

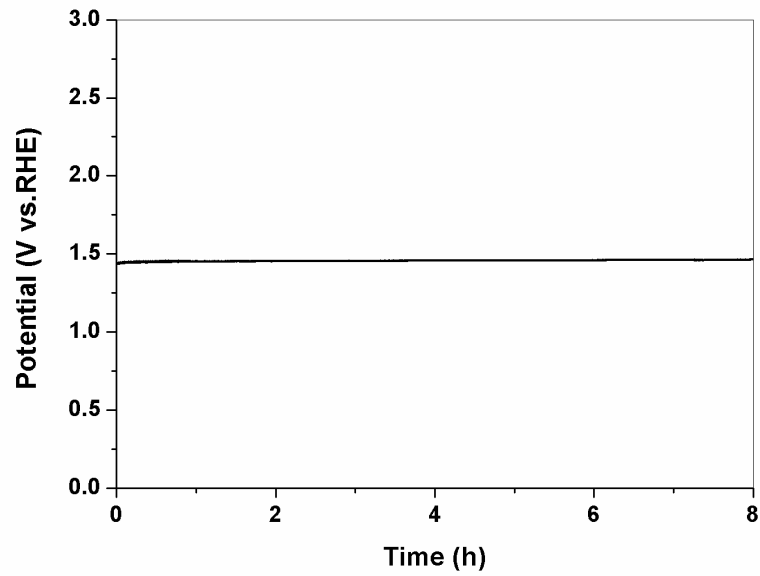

Figure S13. Chronopotentiometry test of  $\text{Co}_{0.11}\text{Ru}_{0.89}\text{O}_{2-\delta}$  (350) at the current density of  $50 \text{ mA cm}^{-2}$ . Related to Figure 3.

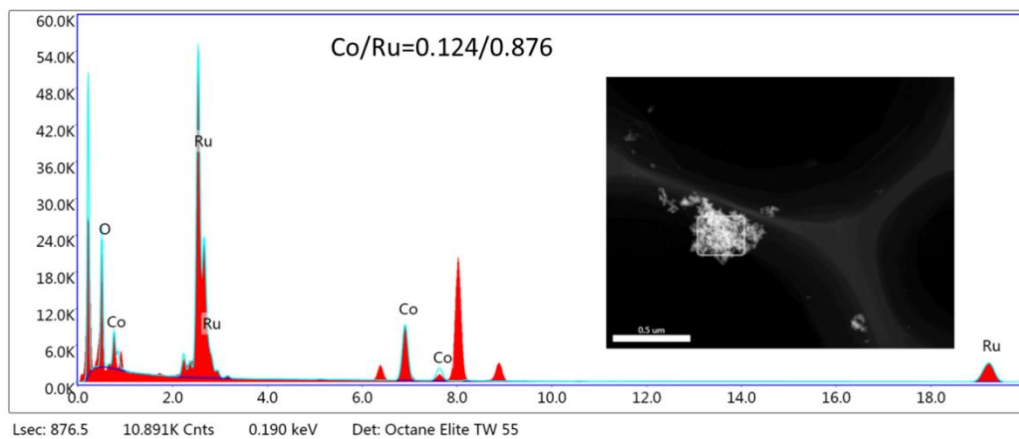

Figure S14. TEM-EDS of  $\text{Co}_{0.11}\text{Ru}_{0.89}\text{O}_{2-\delta}$  (350) before stability test. Related to Figure 3.



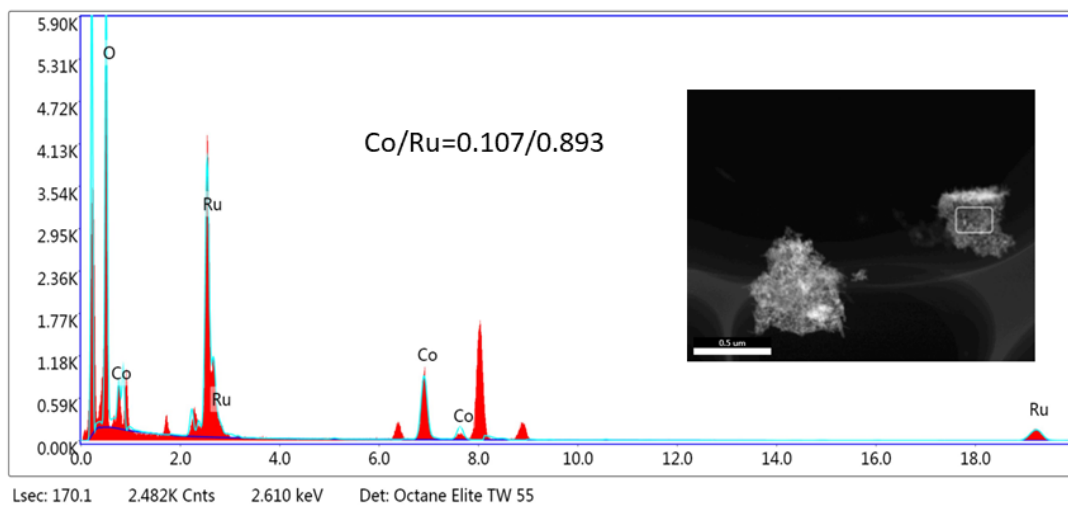

Figure S15. TEM-EDS of  $\text{Co}_{0.11}\text{Ru}_{0.89}\text{O}_{2-\delta}$  (350) after stability test. Related to Figure 3.

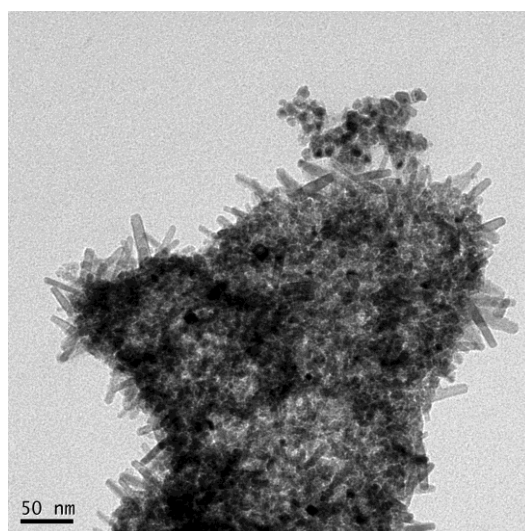

Figure S16. TEM image of  $\text{Co}_{0.11}\text{Ru}_{0.89}\text{O}_{2-\delta}$  (350) after stability test. Related to Figures 2 and 3.

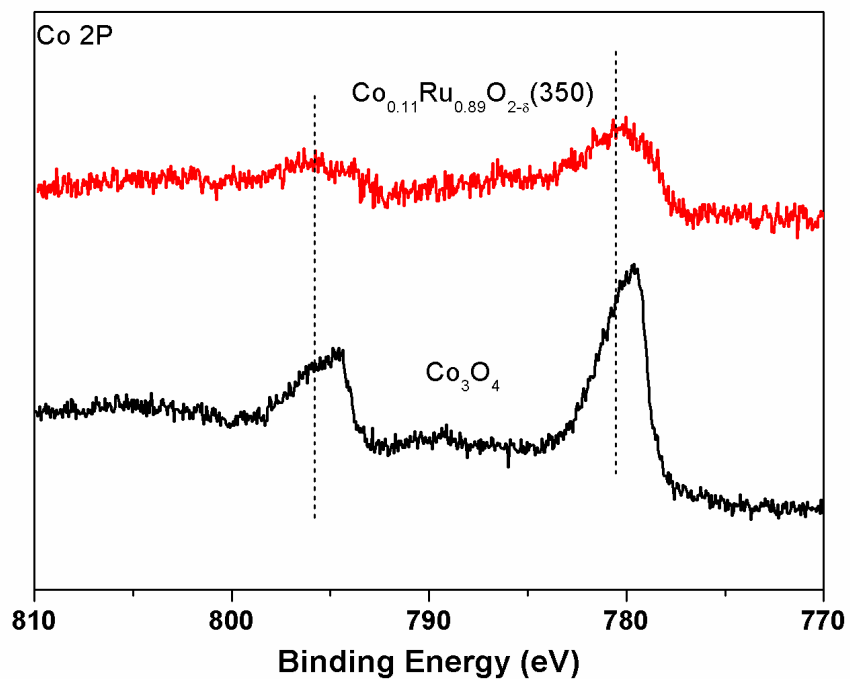

Figure S17. Co 2P XPS profiles of  $\text{Co}_{0.11}\text{Ru}_{0.89}\text{O}_{2-\delta}$  and  $\text{Co}_3\text{O}_4$ .  $\text{Co}_3\text{O}_4$  was synthesized by annealing pure ZIF-67 at 350 °C. Related to Figure 4.

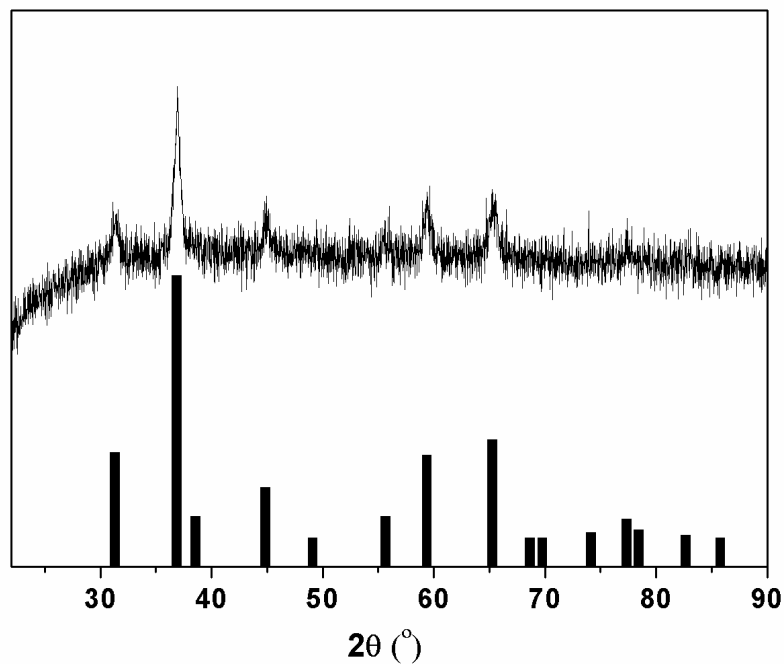

Figure S18. PXRD pattern of the product obtained from annealing pure ZIF-67. The reference patterns of  $\text{Co}_3\text{O}_4$  were obtained from Jade 2004 (JCPDS No. 43-1003).

Related to Figure 4.

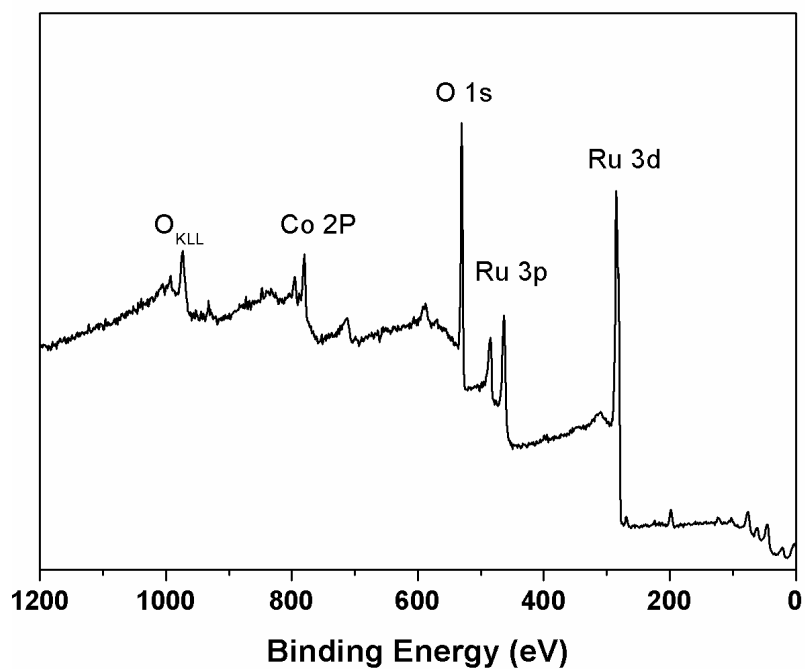

Figure S19. The XPS wide-scan spectra of  $\text{Co}_{0.11}\text{Ru}_{0.89}\text{O}_{2-\delta}$ (350). Related to Figure 4.

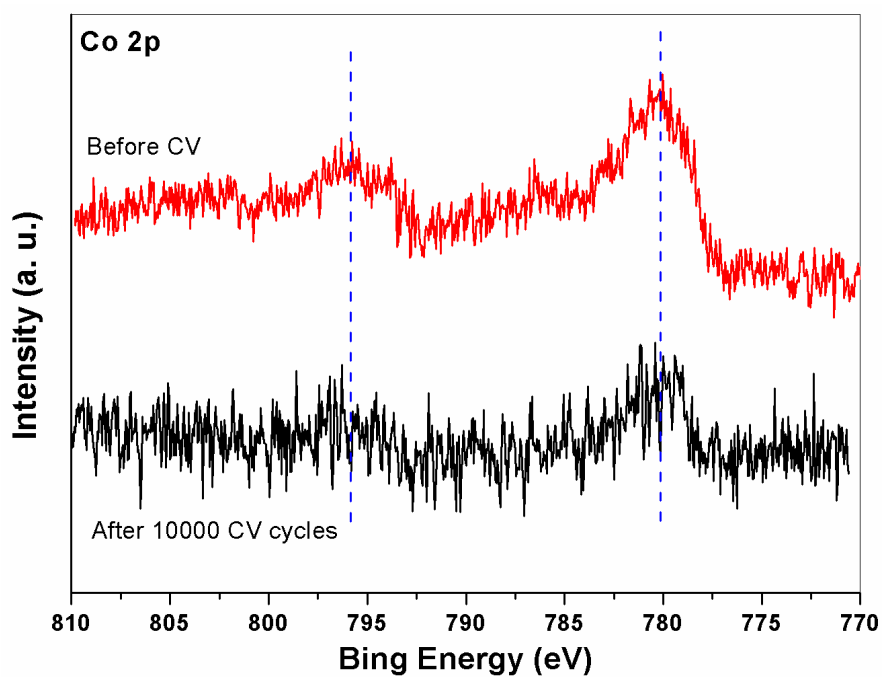

Figure S20. XPS spectra for Co of  $\text{Co}_{0.11}\text{Ru}_{0.89}\text{O}_{2-\delta}$  (350) before and after 10000 CV cycles. Related to Figure 4.

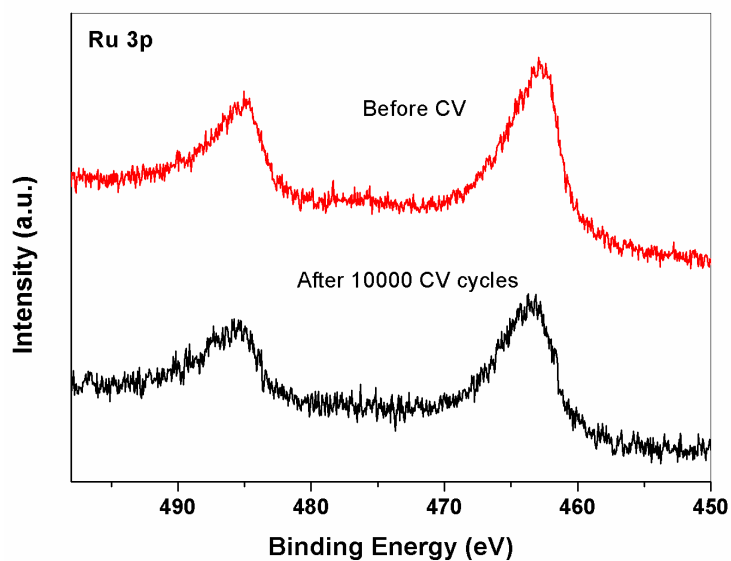

Figure S21. XPS spectra for Ru of  $\text{Co}_{0.11}\text{Ru}_{0.89}\text{O}_{2-\delta}$  (350) before and after 10000 CV cycles. Related to Figure 4.

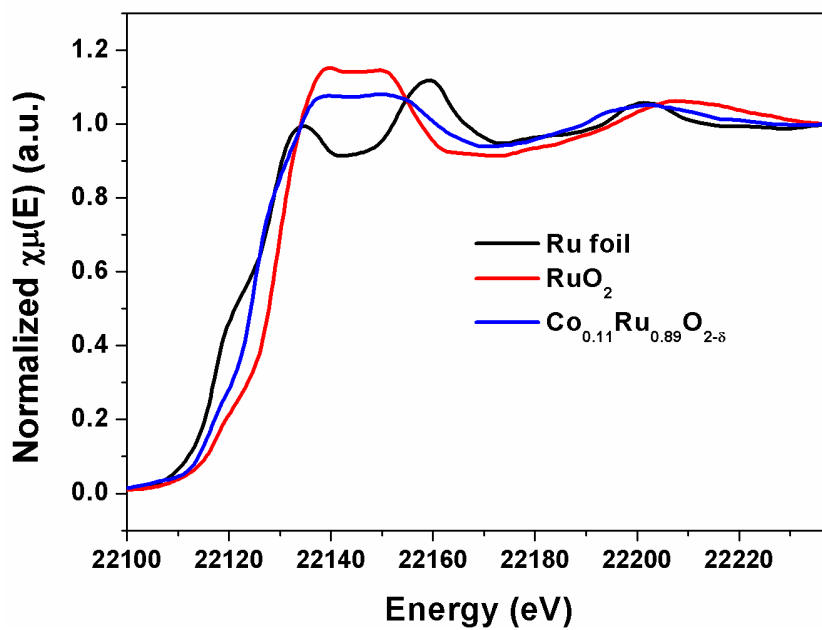

Figure S22. Normalized Ru K-edge XAS spectra of  $\text{Co}_{0.11}\text{Ru}_{0.89}\text{O}_{2-\delta}$ (350),  $\text{RuO}_2$  and Ru foil. Related to Figure 4.

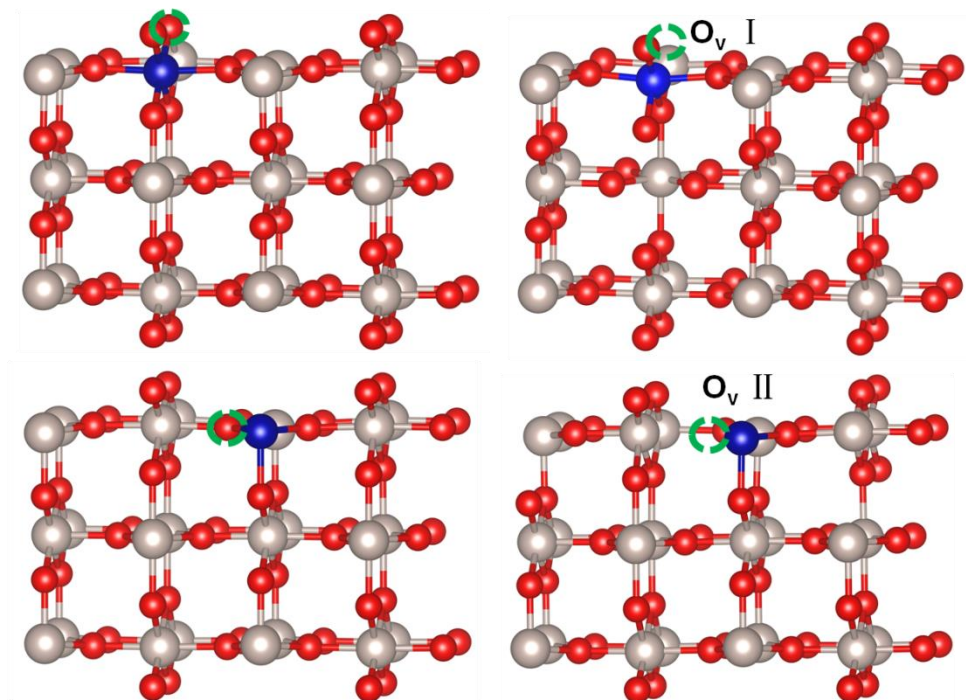

Figure S23. The formation of O vacancy for different Co doping sites. Related to Figure 5.

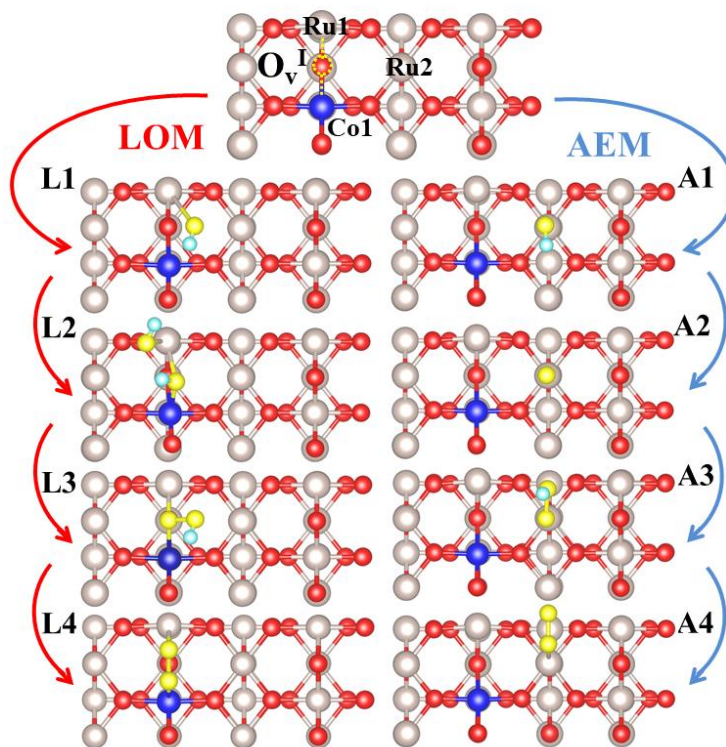

Figure S24. The intermediates along LOM and AEM processes. Related to Figure 5.

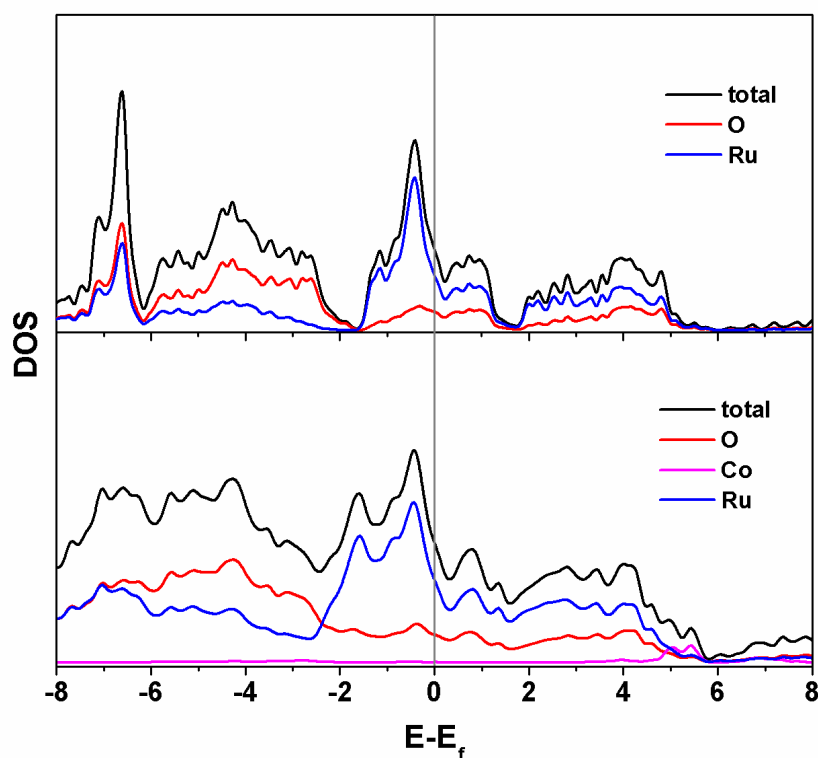

Figure S25. Calculated density of states (DOS) of bulk RuO<sub>2</sub> and Co-doped RuO<sub>2</sub>. Related to Figure 5.

Table S1. The comparison of overpotentials of representative OER electrocatalysts in acidic media. Related to Figure 3.

| Catalyst                                                 | substrate | Electrolyte                          | Overpotentia<br>l at 10 mA<br>cm <sup>-2</sup> (mV) | Chronopotentiometry at<br>specific current density | Ref.                                     |
|----------------------------------------------------------|-----------|--------------------------------------|-----------------------------------------------------|----------------------------------------------------|------------------------------------------|
| Co-RuO <sub>2</sub>                                      | GCE       | 0.5 M H <sub>2</sub> SO <sub>4</sub> | 169                                                 | 50 h @ 10 mA cm <sup>-2</sup>                      | <b>This work</b>                         |
| Cr <sub>0.6</sub> Ru <sub>0.4</sub> O <sub>2</sub> (550) | GCE       | 0.5 M H <sub>2</sub> SO <sub>4</sub> | 178                                                 | 10 h @ 10 mA cm <sup>-2</sup>                      | <i>Nat. Commun.</i><br>2019, 10:162      |
| Ba[Co-PO<br>M]                                           | CP        | 1 M H <sub>2</sub> SO <sub>4</sub>   | 361                                                 | --                                                 | <i>Nat. Chem.</i> 2018,<br>10, 24        |
| 6H-IrO <sub>2</sub>                                      | GCE       | 0.5 M H <sub>2</sub> SO <sub>4</sub> | 248                                                 | 30 h @ 10 mA cm <sup>-2</sup>                      | <i>Nat. Commun.</i><br>2018,9:5236       |
| IrCoNi<br>PHNCs                                          | GCE       | 0.1 M HClO <sub>4</sub>              | 303                                                 | 3.3 h @ 5 mA cm <sup>-2</sup>                      | <i>Adv. Mater.</i> 201,<br>729, 1703798, |
| IrNiCu                                                   | GCE       | 0.1 M HClO <sub>4</sub>              | 300                                                 | --                                                 | <i>ACS Nano.</i> 2017,                   |

|                                                                          |                    |                                       |                              |                              |                                                |
|--------------------------------------------------------------------------|--------------------|---------------------------------------|------------------------------|------------------------------|------------------------------------------------|
| DNF                                                                      |                    |                                       |                              |                              | 11, 5500,                                      |
| Ir                                                                       | GF                 | 0.5 M H <sub>2</sub> SO <sub>4</sub>  | 290                          | 10 h@10 mA cm <sup>-2</sup>  | <i>Nano Energy.</i><br>2017, 40, 27,           |
| Ni <sub>0.5</sub> Mn <sub>0.5</sub> S<br>b <sub>1.7</sub> O <sub>y</sub> | ATO                | 1 M H <sub>2</sub> SO <sub>4</sub>    | ~672                         | 170 h@10 mA cm <sup>-2</sup> | <i>Energy Environ. Sci.</i><br>2017, 10, 2103. |
| W <sub>0.57</sub> Ir <sub>0.43</sub> O<br>3-δ                            | FTO                | 1 M H <sub>2</sub> SO <sub>4</sub>    | 370                          | 0.6 h@10 mA cm <sup>-2</sup> | <i>Energy Environ. Sci.</i> 2017, 10,<br>2432  |
| Co <sub>3</sub> O <sub>4</sub>                                           | FTO                | 0.5 M H <sub>2</sub> SO <sub>4</sub>  | 570                          | 12 h@10 mA cm <sup>-2</sup>  | <i>Chem. Mater.</i><br>2017, 29, 950           |
| Y <sub>2</sub> Ru <sub>2</sub> O <sub>7-δ</sub>                          | GCE                | 0.1 M HClO <sub>4</sub>               | 270@1 mA<br>cm <sup>-2</sup> | 8 h@1 mA cm <sup>-2</sup>    | <i>J. Am. Chem. Soc.</i><br>2017, 139, 12076   |
| IrO <sub>2</sub> -RuO <sub>2</sub><br>@Ru                                | GCE                | 0.5 M H <sub>2</sub> SO <sub>4</sub>  | 281                          | --                           | <i>J. Mater. Chem. A</i><br>2017, 5, 17221     |
| NiFeP                                                                    | Free-standi<br>ng  | 0.05 M H <sub>2</sub> SO <sub>4</sub> | 540                          | 12 h@10 mA cm <sup>-2</sup>  | <i>Adv. Mater.</i> 2017,<br>29, 1606570        |
| IrNi NCs                                                                 | GCE                | 0.1 M HClO <sub>4</sub>               | 280                          | 2 h@5 mA cm <sup>-2</sup>    | <i>Adv. Func. Mater.</i><br>2017, 27, 1700886  |
| Co-IrCu<br>ONC                                                           | GCE                | 0.1 M HClO <sub>4</sub>               | 290                          | --                           | <i>Adv. Func. Mater.</i> 2017, 27,<br>1604688  |
| IrO <sub>x</sub> -Ir                                                     | GC plates          | 0.5 M H <sub>2</sub> SO <sub>4</sub>  | 290                          | 100 h@2 mA cm <sup>-2</sup>  | <i>Angew. Chem. Int. Ed.</i> 2016, 55,<br>752  |
| IrO <sub>x</sub> /SrIrO <sub>3</sub>                                     | SrTiO <sub>3</sub> | 0.5 M H <sub>2</sub> SO <sub>4</sub>  | 270-290                      | 30 h@10 mA cm <sup>-2</sup>  | <i>Science.</i> 2016,<br>353, 1011             |
| BaYIrO <sub>6</sub>                                                      | Au                 | 0.1 M H <sub>4</sub> ClO <sub>4</sub> | ~315                         | 1 h@10 mA cm <sup>-2</sup>   | <i>Nat. Commun.</i><br>2016, 7, 12363          |
| Ir-Ni Oxide                                                              | Ti                 | 0.1 M HClO <sub>4</sub>               | ~270                         | --                           | <i>J. Am. Chem. Soc.</i> 2015, 137,<br>13031   |
| IrNiO <sub>x</sub>                                                       | ATO                | 0.05 M H <sub>2</sub> SO <sub>4</sub> | ~330                         | --                           | <i>Angew. Chem. Int. Ed.</i> 2015, 54,<br>2975 |
| IrO <sub>2</sub>                                                         | GCE                | 0.1 M H <sub>4</sub> ClO <sub>4</sub> | ~430                         | --                           | <i>J. Electrochem. Soc.</i> 1983, 130,<br>825  |

## Transparent Methods

**Materials.** All reagents are of analytical grade and used as received. The commercial RuO<sub>2</sub> and Nafion (5 wt% solution) were purchased from Sigma-Aldrich.

**Synthesis of ZIF-67.** The ZIF-67 nanoparticles were synthesized via a procedure reported in literature. Cobalt nitrate hexahydrate (0.3 g) and 2-methylimidazole (0.66 g) were dissolved in methanol (11.3 g). The two solutions were then mixed and stirred at room temperature at 600 rpm for 24 h. The resulting purple precipitate was separated from the solution by centrifugation at 4000 rpm for 10 minutes and washed three times with methanol and dried overnight at 80 °C. The sample was further dried at 100 °C under vacuum for 12 h for future use.

**Synthesis of Ru-ZIF-67.** Typically, ZIF-67 (0.1 g) powder and desired amount of RuCl<sub>3</sub>·xH<sub>2</sub>O were added into 15 mL tetrahydrofuran (THF) and allowed to stir for 24 h. The resulting precipitate was centrifuged and washed with 3 times with THF, then dried at 80 °C in air. To obtain different Ru content Ru-ZIF-67, the amount of RuCl<sub>3</sub>·xH<sub>2</sub>O added was 0.2 g, 0.3 g, 0.4 g and 0.6 g respectively. For clearness, we denoted these samples as Ru-ZIF-67-A, Ru-ZIF-67-B, Ru-ZIF-67-C, and Ru-ZIF-67-D, respectively.

**Synthesis of Co-doped RuO<sub>2</sub> nanorods.** Co-doped RuO<sub>2</sub> powders were obtained by annealing Ru-ZIF-67 precursors in air at temperatures of 300~500 °C for 4 h. Typically, 20 mg of Ru-ZIF-67-C were placed in crucible and put into a muffle, and then annealed in air with a heating rate of 10 °C min<sup>-1</sup> to 350 °C, and held at 350 °C for 4 h.

**Characterizations.** Powder X-ray diffractions (PXRD) characterization of the samples were performed on a D8-Advance Bruker AXS diffractometer with Cu<sub>Kα</sub> (λ=1.5418 Å)



radiation at a voltage of 40 kV and 40 mA. The sample morphologies were characterized using a field-emission scanning electron microscope (SEM) (Hitachi, S-4800). SEM specimens were prepared by depositing sample powders onto carbon adhesive tapes. Transmission electron microscopy (TEM) images and high-angle annular dark-field scanning transmission electron microscopy (HAADF-STEM) images were carefully recorded on Talos F200X and JEM-ARM200F. The chemical composition and bonding states were measured by X-ray photoelectron spectroscopy (XPS) using a Kratos AXIS ULTRA<sup>DLD</sup> instrument with a monochromic Al-K $\alpha$  X-ray source ( $h\nu=1496.6$  eV). The power was 120 W and the X-ray spot size was set to 700 $\times$ 300  $\mu\text{m}$ . The pass energy of the XPS analyzer was set as 20 eV. The base pressure of the analysis chamber was better than  $5\times 10^{-9}$  Torr. The nitrogen adsorption-desorption isotherm was measured on ASAP 2020M apparatus at 77 K. Before the measurements, the samples were outgassed under vacuum at 160  $^{\circ}\text{C}$  for 12 hours. Raman spectra were recorded on a Renishaw inVia Reflex spectrometer. Inductively coupled plasma-mass spectroscopy (ICP-MS) measurements were carried on NexION 300 (Perkin-Elmer).

**Electrochemical measurements.** In a typical procedure, 4 mg of Co-RuO<sub>2</sub> powder was added to 1 mL of water/ethanol (3:1, v/v) containing 15  $\mu\text{L}$  Nafion aqueous solution (5%, Sigma-Aldrich), and dispersed by sonication under shaking for 30 min to generate a homogeneous black ink. 5  $\mu\text{L}$  of the prepared catalyst ink was drop-cast on a glassy carbon electrode (Geometric area: 0.07065 cm<sup>2</sup>) and dried at room temperature to form a thin film working electrode. A three-electrode system, contained a glassy carbon working electrode, a counter electrode made of platinum wire (diameter: 0.5 mm), and a saturated Hg/Hg<sub>2</sub>SO<sub>4</sub>

reference electrode, were used to measure the electrochemical properties. All measurements were performed in 0.5 M H<sub>2</sub>SO<sub>4</sub> acidic solution. The Hg/Hg<sub>2</sub>SO<sub>4</sub> reference electrode was calibrated with a Pt wire electrode in H<sub>2</sub>-saturated 0.5 M H<sub>2</sub>SO<sub>4</sub> solution. The results showed that the potential difference between the Hg/Hg<sub>2</sub>SO<sub>4</sub> reference electrode and reversible hydrogen electrode was 0.645 V. Cyclic voltammograms (CVs) tests were collected at a scan rate of 100 mV s<sup>-1</sup> typically between 1.2 and 1.6 V. Chronopotentiometric measurements were carried out by applying a constant current of 10 mA cm<sup>-2</sup> for up to 50 h. Electrochemical impedance spectroscopy (EIS) were performed at 1.4 V. The EIS results were presented in the form of Nyquist plot and fitted using ZView software with a representative equivalent electrical circuit. We carried out iR correction according to the literatures reported.[Zheng et al. 2017; Li et al. 2017] The potential was manually corrected using Ohm's law:  $E = E_{app} - iR_s * 0.85$ , where R<sub>s</sub> (solution resistance) is determined to be 9 Ω by EIS (Figure 3c).

### **Calculation details**

All DFT calculations are carried out by using the Vienna ab-initio Simulation Package (VASP) [Kresse, et al. 1996] to optimize geometry structures and energies. The exchange–correlation functional is performed within the generalized gradient approximation proposed by Perdew–Burke–Ernzerh (GGA-PBE).[Perdew, et al. 1996; Perdew, et al. 1992; ] The core electrons is described by the Projector Augmented Wave (PAW) potential,[Blochl, et al. 1994] and the cut-off kinetic energies for the plane waves are set to 500 eV.[Kresse, et al. 1994] The convergence criteria of energy and force on each atom after relaxation are less than 10<sup>-4</sup> eV

and 0.02 eV/Å<sup>3</sup>, respectively. The RuO<sub>2</sub>(110) is built with 2\*2 supercell with fixing two bottom layers in the geometry optimization. The Brillouin zone is sampled by Gamma point [Hendrik, et al. 1976] and a vacuum distance of 15 Å along z direction was set to ensure sufficient vacuum on surface. The Thermal and zero point energy (ZPE) corrections are further calculated by DFT-D3 to obtain the Gibbs free energy (ΔG), which is determined following  $\Delta G = \Delta E + \Delta EZPE - T\Delta S$ , according to the standard hydrogen electrode (SHE) model proposed by Nørskov et al. [Peterson, et al. 2010]. Grimme's DFT-D3 scheme are expected to provide dispersion correction in van der Waals (vdW) interactions. [Grimme, et al. 2010; Grimme, et al. 2011]. ΔE, ΔEZPE and ΔS are the electronic total energy differences, the differences in the zero point energy and the change of entropy, respectively. T is the temperature set to 298.15 K.

Free energy calculations: The Gibbs free energy changes are calculated by the following equations (1) to (4) for AEM while those for LOM are calculated by the equations (5) to (8) [Rossmeisl, et al. 2005].

$$\Delta G_1 = \Delta G_{O^*} - \Delta G_{OH^*} - eU + \Delta G_{H^+} (pH) \quad (1)$$

$$\Delta G_2 = \Delta G_{OOH^*} - \Delta G_{O^*} - eU + \Delta G_{H^+} (pH) \quad (2)$$

$$\Delta G_3 = \Delta G_{OO^*} - \Delta G_{OOH^*} - eU + \Delta G_{H^+} (pH) \quad (3)$$

$$\Delta G_4 = 4.92eV + \Delta G_{OH^*} - \Delta G_{OO^*} - eU + \Delta G_{H^+} (pH) \quad (4)$$

$$\Delta G_1 = \Delta G_{[Ov-OH]^*} - \Delta G_{[Ov-OO]^*} - eU + \Delta G_{H^+} (pH) \quad (5)$$

$$\Delta G_2 = \Delta G_{[OH+Ov-OH]^*} - \Delta G_{[Ov-OOH]^*} - eU + \Delta G_{H^+} (pH) \quad (6)$$

$$\Delta G_3 = \Delta G_{[Ov-OOH]^*} - \Delta G_{[OH+Ov-OH]^*} - eU + \Delta G_{H^+} (pH) \quad (7)$$

$$\Delta G_4 = 4.92 \text{ eV} + \Delta G_{[\text{Ov-OO}]^*} - \Delta G_{[\text{Ov-OOH}]^*} - eU + \Delta G_{\text{H}^+}(\text{pH}) \quad (8)$$

where  $U$  is the potential determined against by normal hydrogen electrode (NHE) at standard condition ( $T = 298.15 \text{ K}$ ,  $P = 1 \text{ bar}$ ,  $\text{pH} = 0$ ) [Nørskov et al. 2004]. The free energy changes of the protons relative to the above-specified electrode at non-zero pH is represented by Nernst equation as  $\Delta G_{\text{H}^+}(\text{pH}) = -k_{\text{B}}T \ln(10) \times \text{pH}$ . The Gibbs free energy differences of these intermediates include zero-point energy (ZPE) and entropy corrections according to  $\Delta G = \Delta E + \Delta \text{ZPE} - T\Delta S$ , where the energy differences  $\Delta E$  are calculated with respect to  $\text{H}_2\text{O}$  and  $\text{H}_2$  (at  $U = 0$  and  $\text{pH} = 0$ ). The theoretical overpotential is defined as the lowest potential at which all reaction steps are thermodynamically downhill. [Man, et al. 2011; Doyle, et al. 2015]

## References

- Bloch, P. E. (1994). Projector augmented-wave method. *Phys. Rev. B.* *50*, 27.
- Doyle, A. D., Montoya, J. H., Vojvodic, A. (2015) Improving oxygen electrochemistry through nanoscopic confinement. *ChemCatChem* *7*, 738.
- Grimme, S., Antony, J., Ehrlich, S., Krieg, H. (2010). A consistent and accurate ab initio parametrization of density functional dispersion correction (DFT-D) for the 94 elements H-Pu. *J. Chem. Phys.* *132*, 154104.
- Grimme, S., Ehrlich, S., Goerigk, L. (2011). Effect of the Damping Function in Dispersion Corrected Density Functional Theory. *J. Comput. Chem.* *32*, 1456.
- Hendrik, J., Ma, J. (1976). Special points for Brillouin-zone integrations. *Phys Rev B.* *13*, 5.
- Kresse, G., Furthmuller, J. (1996). Efficient iterative schemes for *ab initio* total-energy calculations using a plane-wave basis set. *Phys. Rev. B* *54*, 11169-11186.
- Li, Y., Cui, F., Ross, M.B., Kim, D., Sun, Y., Yang, P. (2017). Structure-sensitive  $\text{CO}_2$  electroreduction to hydrocarbons on ultrathin 5-fold twinned copper nanowires. *Nano Lett.* *17*, 1312-1317.
- Man I. C. et al. (2011). Universality in oxygen evolution electrocatalysis on oxide surfaces. *ChemCatChem*, *3*, 1159.

Nørskov J. K. et al. (2004). Origin of the overpotential for oxygen reduction at a fuel-cell cathode. *J. Phys.Chem. B* *108*, 17886.

Perdew, J.P., Burke, K., Ernzerhof, M. (1996). Generalized gradient approximation made simple. *Phys. Rev. Lett.* *77*, 3865.

Perdew J.P., Wang Y. (1992). Pair-distribution function and its coupling-constant average for the spin-polarized electron gas. *Phys. Rev. B: Condens Matter.* *46*, 12947.

Peterson, A. A., Abild-Pedersen, F., Studt, F., Rossmeisl, J., Nørskov, J. K. (2010). How copper catalyzes the electroreduction of carbon dioxide into hydrocarbon fuels. *Energy Environ. Sci.* *3*, 1311.

Rossmeisl, J., Logadottir, A., Nørskov J.K. (2005). Electrolysis of water on (oxidized) metal surfaces, *Chem. Phys.* *319*, 178.

Zheng, X., et al (2017). Sulfur-modulated tin sites enable highly selective electrochemical reduction of CO<sub>2</sub> to format. *Joule*, *1*, 794–805.
